# Supplementary material for: Effect of doping on the phase stability and photophysical properties of CsPbI2Br perovskite thin films
Source: Royal Society of Chemistry journal article supplement (doi:10.1039/d0ra08912e), 2021-01-01
Supplement: d0ra08912e1.pdf [file d0ra08912e1.pdf]

## Effect of doping on the Phase Stability and Photophysical Properties of CsPbI<sub>2</sub>Br Perovskite Thin Films

L. Atourki<sup>1</sup>, M. Bernabé<sup>2</sup>, M. Makha<sup>3</sup>, K. Bouabid<sup>4</sup>, M. Regragui<sup>1</sup>, A. Ihlal<sup>4</sup>, M. Abd-lefdil<sup>1</sup>,  
M. Mollar<sup>2</sup>.

<sup>1</sup> MANAPSE Lab, Faculty of Science – Mohammed V University in Rabat, 4 Avenue Ibn Batouta BP 1014  
RP, RABAT Morocco

<sup>2</sup> Institute of Design & Fabrication (IDF) – Polytechnic University of Valencia UPV, Spain

<sup>3</sup> Materials Science, Energy and Nano-engineering Department, Mohammed VI Polytechnic University  
(UM6P), Lot 660, Hay Moulay Rachid, 43150 Bengurir Morocco.

<sup>4</sup> Materials and Renewable Energies Laboratory (LMER), Ibn Zohr University, Agadir, Morocco

Corresponding author: [Oucine.atourki@um5.ac.ma](mailto:Oucine.atourki@um5.ac.ma)

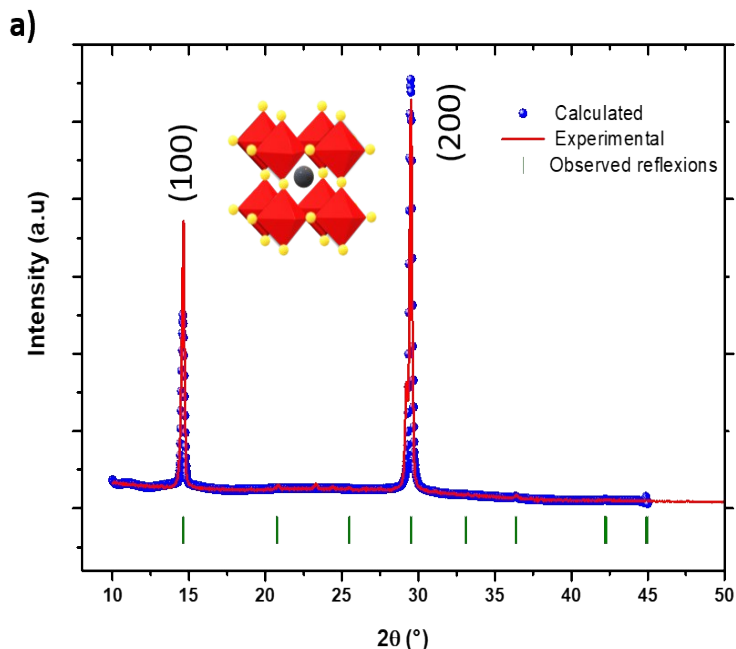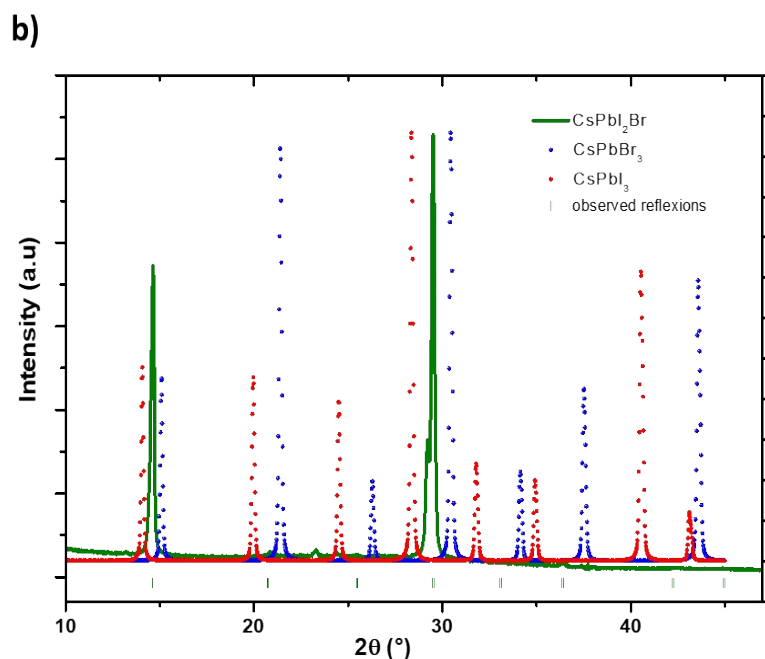

**S.1 a)** Experimental and calculated XRD pattern of the spin coated CsPbI<sub>2</sub>Br films **b)** Experimental XRD pattern of CsPbI<sub>2</sub>Br, CsPbI<sub>3</sub> and CsPbBr<sub>3</sub>.

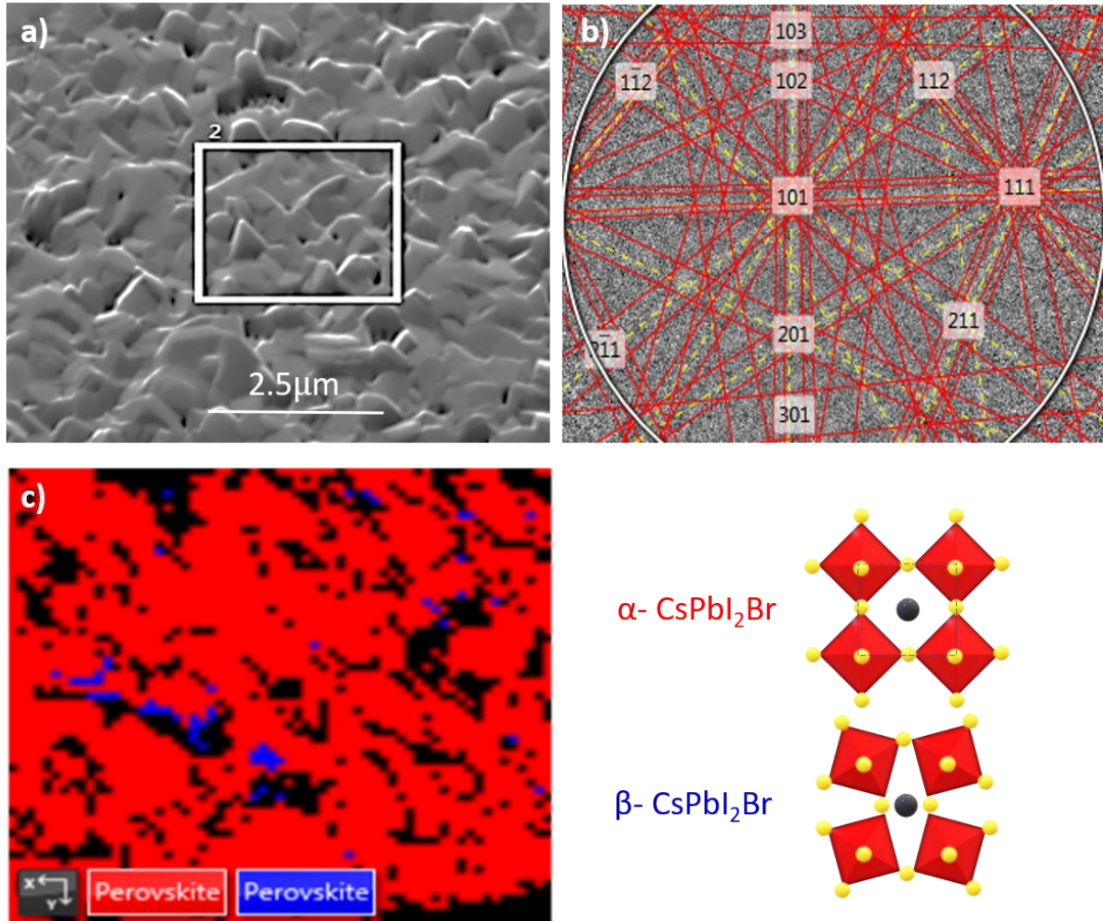

**S.2 a)** Scanning electron microscope (SEM) image of CsPbI<sub>2</sub>Br thin film tilted at 70° **b)** representative sharp Kikuchi diffraction lines of CsPbI<sub>2</sub>Br thin film collected in traditional electron backscatter diffraction (EBSD) geometry at 20 kV accelerating voltage **c)** Inverse pole figure (IPF) map generated from EBSD of CsPbI<sub>2</sub>Br thin film with IPF color key of the two perovskite phases α-CsPbI<sub>2</sub>Br and β-CsPbI<sub>2</sub>Br

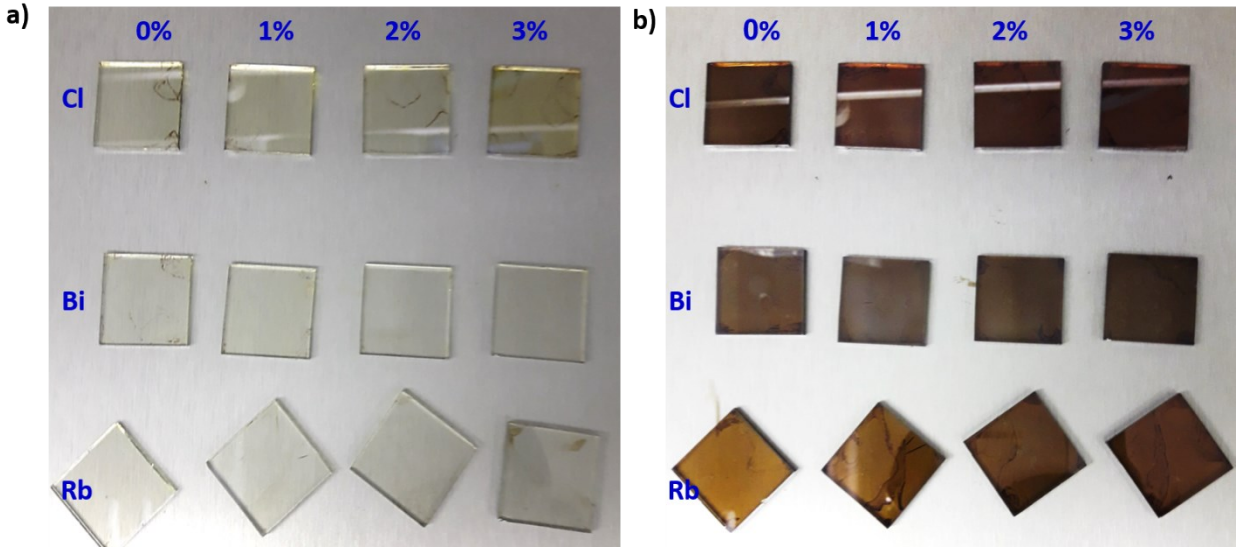

**S.3** The visually image of dark brown colored phase of CsPbI<sub>2</sub>Br films synthesized in this work during different phases of thermal annealing: **a)** After 1 min at 60 °C, **b)** after 10 min at 180 °C.

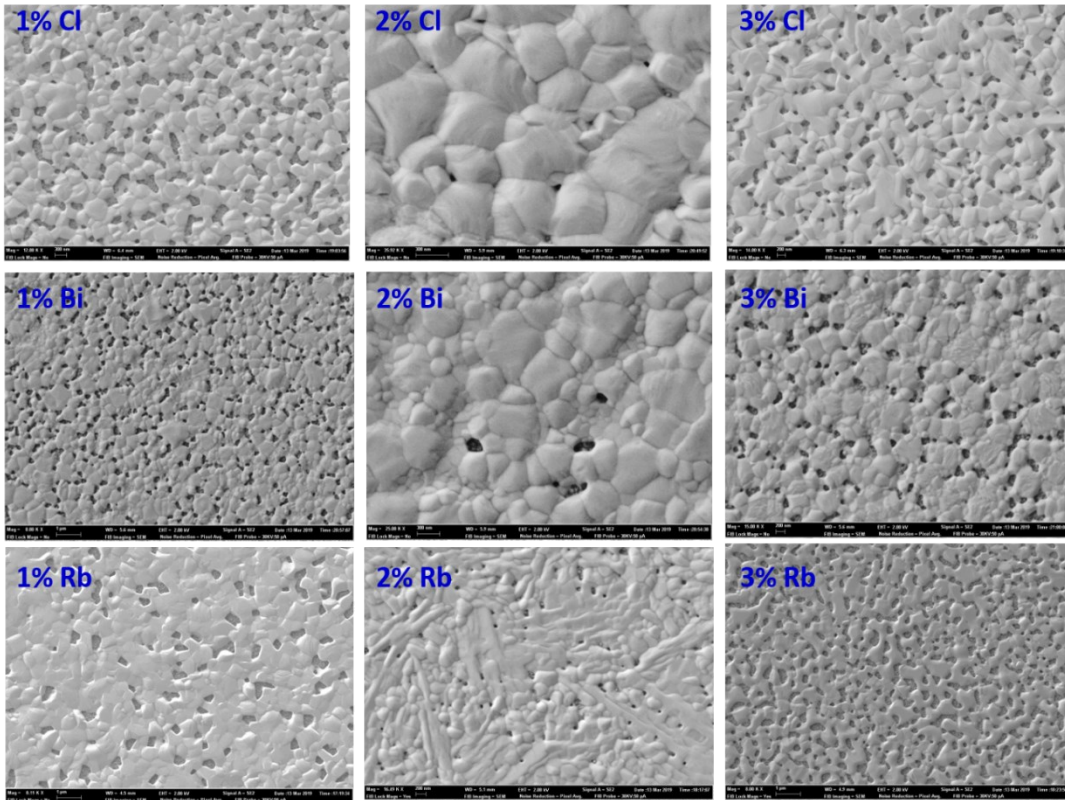

**S.4** SEM images of different CsPbBr<sub>2</sub>I doped with Cl, Bi and Rb with different concentration

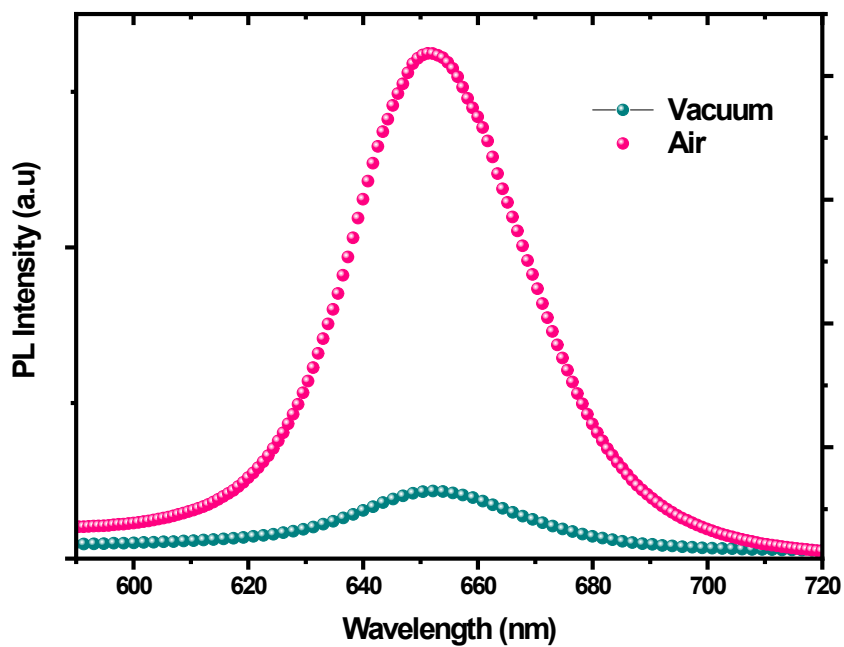

**S.5** PL spectra of Rubidium doped CsPbI<sub>2</sub>Br films with different Rb percentage.

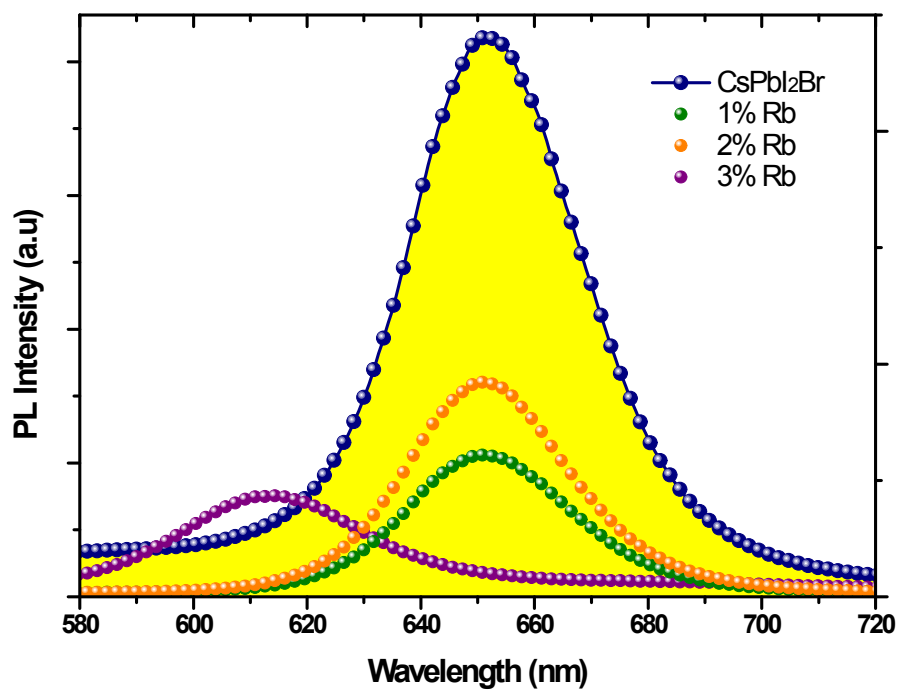

**S.6** PL spectra of CsPbI<sub>2</sub>Br films with different in vacuum and in ambient air.

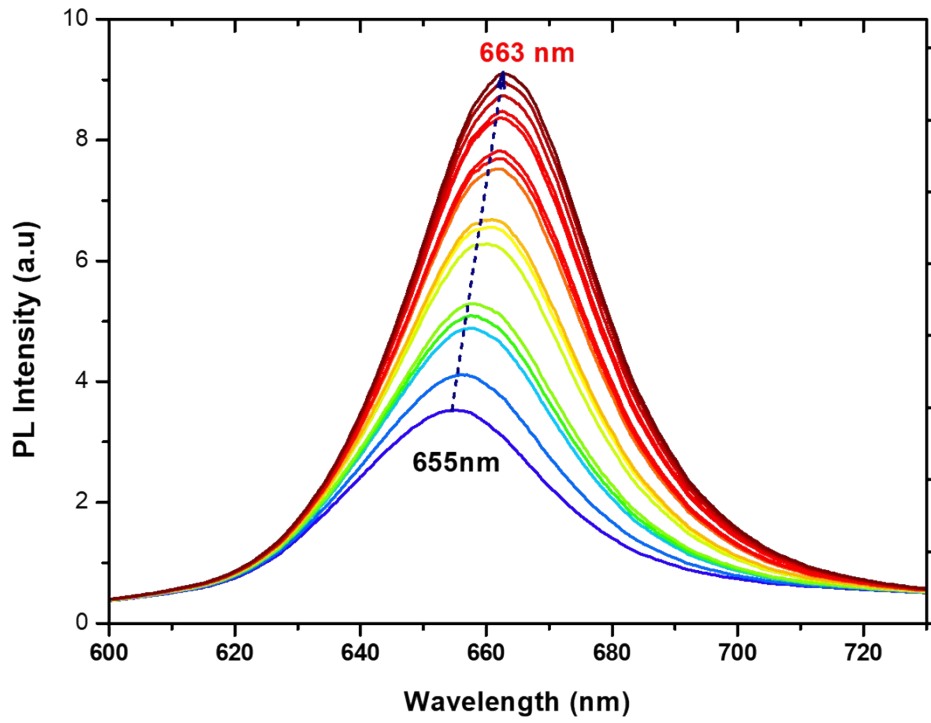

**S.7** PL spectrum of CsPbI<sub>2</sub>Br film under continuous laser illumination
